# Supplementary material
Source: Elsevier journal article supplement (https://www.sciencedirect.com/science/article/pii/S0212656716305522)
Supplement: mmc1 [file S0212656716305522:mmc1.docx]

Tabla 1 (Suplementaria). Autopercepción del estado de salud general

(últimos 12 meses) según dolor crónico.

| Poblaciones | Muy bueno | Bueno | Regular | Malo o Muy Malo |
| --- | --- | --- | --- | --- |
| No Dolor crónico | 19,71% (1046) | 64,14% (3402) | 14,15% (752) | 2,01% (107) |
| Intervalo de confianza 95% | (18,67-20,79) | (62,85-65,4) | (13,24-15,11) | (1,66-2,42) |
| Dolor crónico no discapacitante | 10,9% (40) | 61,1% (225) | 23,4% (86) | 4,6% (17) |
| Intervalo de confianza 95% | (8,1-14,5) | (56-65,9) | (19,4-28) | (2,9-7,3) |
| Dolor crónico discapacitante | 4% (30) | 40% (299) | 40,7% (303) | 15,3% (114) |
| Intervalo de confianza 95% | (2,8-5,7) | (36,6-43,6) | (37,2-44,2) | (12,9-18) |
| Test | F(6;38843,646)= 118,043; p < 0,001 | | | |
