# Supplementary material
Source: Elsevier journal article supplement (https://www.sciencedirect.com/science/article/pii/S0212656716305522)
Supplement: mmc2 [file S0212656716305522:mmc2.docx]

Tabla 2 (Suplementaria). Calidad de vida relacionada con la salud según dolor crónico discapacitante.

| Poblaciones | Puntuación componente físico (SF-12) | | | | Puntuación componente mental (SF-12) | | | |
| --- | --- | --- | --- | --- | --- | --- | --- | --- |
| MEDIA | Intervalo de confianza 95% | CV | TEST | MEDIA | Intervalo de confianza 95% | CV | TEST |
| No Dolor crónico | 52,502 (5331) | (52,29-52,72) | 0,002 | U de Mann-Whitney = 1591720;  p<0,001 | 51,376 (5331) | (51,15-51,6) | 0,002 | U de Mann-Whitney = 2300403,5; p<0,001 |
| Dolor Crónico no Discapacitante | 51,03 (306) | (50,12-51,94) | 0,011 | Kruskal Wallis = 803,73; g.l=2  p<0,001 | 49,77 (306) | (48,86-50,69) | 0,011 | Kruskal Wallis = 154,83; g.l=2  p<0,001 |
| Dolor Crónico Discapacitante | 40,712 (721) | (39,87-41,56) | 0,011 | 45,73 (721) | (44,85-46,61) | 0,010 |
