# Supplementary material
Source: Elsevier journal article supplement (https://www.sciencedirect.com/science/article/pii/S0212656716305522)
Supplement: mmc3 [file S0212656716305522:mmc3.docx]

Tabla 3 (Suplementaria). Características físicas del trabajo de la población

de estudio (Andalucía, 2011).

| Variable  (muestra perdida) | Categoría  (población que trabaja, n=2221) | Estimación (n) | Intervalo de Confianza al 95% | |
| --- | --- | --- | --- | --- |
| Inferior | Superior |
| Personas que trabajan bajo su responsabilidad  (17, 0,8%) | Ninguna | 80,3% (1771) | 78,6% | 81,9% |
| De 1 a 5 | 14,8% (326) | 13,4% | 16,4% |
| De 6 a 9 | 2,1% (47) | 1,6% | 2,8% |
| De 10 a 20 | 1,4% (31) | 1% | 2% |
| Más de 20 | 1,3% (29) | 0,9% | 1,9% |
| Expuesto en el trabajo a ‘Ruido tan alto como para levantar la voz para hablar con otra gente’ (14, 0,6%) | Siempre | 6,1% (134) | 5,2% | 7,2% |
| Muchas veces | 14% (309) | 12,6% | 15,5% |
| Algunas veces | 30% (662) | 28,1% | 31,9% |
| Nunca | 50% (1102) | 47,9% | 52,1% |
| Expuesto en el trabajo a ‘Altas/bajas temperaturas’  (18, 0,8%) | Siempre | 11,7% (256) | 10,4% | 13% |
| Muchas veces | 15,9% (352) | 14,5% | 17,5% |
| Algunas veces | 26,1% (575) | 24,3% | 27,9% |
| Nunca | 46,3% (1020) | 44,3% | 48,4% |
| Expuesto en el trabajo a ‘Respirar vapores, humos, polvo, o sustancias peligrosas,,,/Manejar o tocas sustancias o productos peligrosos/Radiaciones como rayos X, soldadura, rayos láser’  (19, 0,9%) | Siempre | 5,4% (118) | 4,5% | 6,4% |
| Muchas veces | 9,1% (201) | 8% | 10,4% |
| Algunas veces | 19,5% (430) | 17,9% | 21,2% |
| Nunca | 66% (1453) | 64% | 68% |
| Expuesto en el trabajo a ‘Posiciones dolorosas / fatigantes’  (20, 0,9%) | Siempre | 10,5% (230) | 9,3% | 11,8% |
| Muchas veces | 21,8% (481) | 20,1% | 23,6% |
| Algunas veces | 34,3% (755) | 32,3% | 36,3% |
| Nunca | 33,4% (735) | 31,5% | 35,4% |
| Expuesto en el trabajo a ‘Tareas repetitivas de menos de 10 minutos /Movimientos repetitivos de manos o brazos’  (19, 0,9%) | Siempre | 22,4% (492) | 20,7% | 24,1% |
| Muchas veces | 27,9% (615) | 26,1% | 29,8% |
| Algunas veces | 25,8% (568) | 24% | 27,6% |
| Nunca | 24% (527) | 22,2% | 25,8% |
| Expuesto en el trabajo a ‘Manipular cargas pesadas (más de 15 kgrs)’  (19, 0,9%) | Siempre | 9% (197) | 7,9% | 10,3% |
| Muchas veces | 18,2% (402) | 16,7% | 19,9% |
| Algunas veces | 30% (661) | 28,1% | 31,9% |
| Nunca | 42,8% (942) | 40,7% | 44,9% |
| Expuesto en el trabajo a ‘Trabajos al aire libre’  (19, 0,9%) | Siempre | 13,8% (303) | 12,4% | 15,3% |
| Muchas veces | 13,3% (294) | 12% | 14,8% |
| Algunas veces | 19,3% (425) | 17,7% | 21% |
| Nunca | 53,6% (1180) | 51,6% | 55,7% |
