# Supplementary material
Source: Elsevier journal article supplement (https://www.sciencedirect.com/science/article/pii/S0212656716305522)
Supplement: mmc4 [file S0212656716305522:mmc4.docx]

Tabla 4 (Suplementaria). Características psíquicas del trabajo de la población de estudio (Andalucía, 2011).

| Variablea (muestra perdida) | Categoría (población que trabaja, n=2221) | Estimación | Intervalo de Confianza al 95% | |
| --- | --- | --- | --- | --- |
| Inferior | Superior |
| ¿Tiene usted que trabajar muy rápido? (11, 0,5%) | Siempre | 19,7% | 18,1% | 21,4% |
| Muchas veces | 23,0% | 21,3% | 24,8% |
| Algunas veces | 36,5% | 34,6% | 38,6% |
| Solo alguna vez | 10,8% | 9,6% | 12,2% |
| Nunca | 9,9% | 8,7% | 11,2% |
| ¿La distribución de tareas es irregular y provoca que se le acumule el trabajo? (14, 0,6%) | Siempre | 11,8% | 10,5% | 13,1% |
| Muchas veces | 19,8% | 18,2% | 21,5% |
| Algunas veces | 33,9% | 32,0% | 35,9% |
| Solo alguna vez | 15,1% | 13,7% | 16,7% |
| Nunca | 19,3% | 17,7% | 21,0% |
| ¿Tiene usted tiempo de llevar al día su trabajo? (11, 0,5%) | Siempre | 45,8% | 43,8% | 47,9% |
| Muchas veces | 29,9% | 28,0% | 31,8% |
| Algunas veces | 19,0% | 17,4% | 20,7% |
| Solo alguna vez | 2,9% | 2,3% | 3,7% |
| Nunca | 2,4% | 1,8% | 3,1% |
| ¿Le cuesta olvidar los problemas del trabajo? (22, 1%) | Siempre | 14,9% | 13,5% | 16,4% |
| Muchas veces | 16,4% | 14,9% | 18,0% |
| Algunas veces | 30,7% | 28,8% | 32,6% |
| Solo alguna vez | 17,8% | 16,2% | 19,4% |
| Nunca | 20,3% | 18,7% | 22,0% |
| ¿Su trabajo, en general, es desgastador emocionalmente? (21, 1%) | Siempre | 17,1% | 15,7% | 18,8% |
| Muchas veces | 18,7% | 17,1% | 20,3% |
| Algunas veces | 27,6% | 25,7% | 29,5% |
| Solo alguna vez | 16,1% | 14,7% | 17,7% |
| Nunca | 20,5% | 18,9% | 22,2% |
| ¿Su trabajo requiere que esconda sus emociones? (33, 1,5%) | Siempre | 29,7% | 27,8% | 31,6% |
| Muchas veces | 20,4% | 18,8% | 22,2% |
| Algunas veces | 20,6% | 19,0% | 22,4% |
| Solo alguna vez | 11,7% | 10,4% | 13,1% |
| Nunca | 17,6% | 16,0% | 19,2% |
| ¿Tiene influencia sobre la cantidad de trabajo que se le asigna? (32, 1,4%) | Siempre | 31,6% | 29,7% | 33,6% |
| Muchas veces | 20,7% | 19,1% | 22,5% |
| Algunas veces | 22,2% | 20,6% | 24,0% |
| Solo alguna vez | 8,9% | 7,8% | 10,2% |
| Nunca | 16,5% | 15,0% | 18,1% |
| ¿Se tiene en cuenta su opinión cuando se le asignan tareas? (20, 0,9%) | Siempre | 38,5% | 36,5% | 40,5% |
| Muchas veces | 24,6% | 22,9% | 26,5% |
| Algunas veces | 21,1% | 19,4% | 22,8% |
| Solo alguna vez | 7,6% | 6,6% | 8,8% |
| Nunca | 8,2% | 7,1% | 9,4% |
| ¿Tiene influencia sobre el orden en el que realiza las tareas? (26, 1,2%) | Siempre | 39,8% | 37,8% | 41,8% |
| Muchas veces | 24,6% | 22,8% | 26,4% |
| Algunas veces | 20,9% | 19,2% | 22,6% |
| Solo alguna vez | 7,0% | 6,0% | 8,1% |
| Nunca | 7,8% | 6,8% | 9,0% |
| ¿Puede decidir cuándo hace un descanso? (28, 1,3%) | Siempre | 39,1% | 37,1% | 41,1% |
| Muchas veces | 21,4% | 19,7% | 23,1% |
| Algunas veces | 20,0% | 18,4% | 21,7% |
| Solo alguna vez | 8,5% | 7,4% | 9,7% |
| Nunca | 11,1% | 9,8% | 12,5% |
| Si tiene algún asunto personal o familiar, ¿puede dejar su puesto de trabajo al menos una hora sin tener que pedir un permiso especial? (17, 0,8%) | Siempre | 44,8% | 42,8% | 46,9% |
| Muchas veces | 19,2% | 17,6% | 20,9% |
| Algunas veces | 17,1% | 15,6% | 18,8% |
| Solo alguna vez | 6,6% | 5,6% | 7,7% |
| Nunca | 12,2% | 10,9% | 13,6% |
| ¿Su trabajo requiere que tenga iniciativa? (22, 1%) | Siempre | 50,0% | 47,9% | 52,1% |
| Muchas veces | 24,9% | 23,1% | 26,7% |
| Algunas veces | 16,4% | 14,9% | 18,0% |
| Solo alguna vez | 4,4% | 3,6% | 5,3% |
| Nunca | 4,4% | 3,6% | 5,4% |
| ¿Su trabajo le permite que aprenda cosas nuevas? (20, 0,9%) | Siempre | 46,1% | 44,1% | 48,2% |
| Muchas veces | 22,4% | 20,8% | 24,2% |
| Algunas veces | 20,8% | 19,1% | 22,5% |
| Solo alguna vez | 5,7% | 4,8% | 6,7% |
| Nunca | 5,0% | 4,2% | 6,0% |
| ¿Se siente comprometido con su profesión? (17, 0,8%) | Siempre | 55,6% | 53,5% | 57,6% |
| Muchas veces | 24,3% | 22,6% | 26,1% |
| Algunas veces | 14,8% | 13,4% | 16,3% |
| Solo alguna vez | 3,5% | 2,8% | 4,4% |
| Nunca | 1,8% | 1,3% | 2,4% |
| ¿Tienen sentido sus tareas? (15, 0,7%) | Siempre | 61,9% | 59,8% | 63,8% |
| Muchas veces | 22,8% | 21,1% | 24,6% |
| Algunas veces | 13,0% | 11,6% | 14,4% |
| Solo alguna vez | 1,9% | 1,4% | 2,5% |
| Nunca | 0,5% | 0,3% | 1,0% |
| ¿Habla usted con entusiasmo de su empresa a otras personas? (14, 0,6%) | Siempre | 48,6% | 46,5% | 50,6% |
| Muchas veces | 24,8% | 23,0% | 26,6% |
| Algunas veces | 19,5% | 17,9% | 21,2% |
| Solo alguna vez | 4,2% | 3,4% | 5,1% |
| Nunca | 2,9% | 2,3% | 3,7% |
