# Supplementary material
Source: Elsevier journal article supplement (https://www.sciencedirect.com/science/article/pii/S0212656716305522)
Supplement: mmc5 [file S0212656716305522:mmc5.docx]

Tabla 5 (Suplementaria). Número medio de medicamentos consumidos según dolor crónico discapacitante.

| Poblaciones | | MEDIA (n) | Intervalo de confianza 95% | CV (%) | TEST COMPARACIÓN DE MEDIAS |
| --- | --- | --- | --- | --- | --- |
| Dolor crónico | No | 0,896 (5386) | 0,86-0,93 | 1,8 | U de Mann-Whitney = 1442192,5; p < 0,001 |
| Sí, no discapacitante | 1,578 (371) | 1,429-1,727 | 4,8 |
| Sí, discapacitante | 2,772 (748) | 2,63-2,91 | 2,6 |
| Población general | | 1,15 (6507) | 1,115-1,186 | 1,6 | - |

a Al menos una enfermedad crónica de estudio a excepción de las de dolor
