# Supplementary material
Source: Elsevier journal article supplement (https://www.sciencedirect.com/science/article/pii/S0212656716305522)
Supplement: mmc6 [file S0212656716305522:mmc6.docx]

Tabla 6 (Suplementaria). Prevalencia de dolor crónico según autovaloración de estado de salud general (últimos 12 meses).

| **Tipo dolor crónico** | **Muy bueno (n=1116)** | **Bueno (n=3926)** | **Regular (n=1141)** | **Malo o Muy Malo (n=220)** |
| --- | --- | --- | --- | --- |
| No discapacitante (n) | 3,6% (40) | 5,7% (225) | 7,5% (82) | 6,6% (27) |
| Intervalo de confianza 95% | (2,6-4,8) | (5-6,5) | (6,1-9,2) | (4,2-10,4) |
| CV | 0,149 | 0,065 | 0,104 | 0,234 |
| Discapacitante (n) | 2,7% (30) | 7,6% (299) | 26,6% (303) | 44,7% (114) |
| Intervalo de confianza 95% | (1,9-3,8) | (6,8-8,5) | (24,1-29,3) | (38,7-50,8) |
| CV | 0,18 | 0,055 | 0,049 | 0,07 |
| Test | F(6;38843,646)= 118,043; p < 0,001 | | | |

a Al menos una enfermedad crónica de estudio a excepción de las de dolor
