# Supplementary material
Source: Elsevier journal article supplement (https://www.sciencedirect.com/science/article/pii/S0212656716305522)
Supplement: mmc7 [file S0212656716305522:mmc7.docx]

Tabla 7 (Suplementaria). Prevalencia de Dolor Crónico Discapacitante según problemas de salud relacionados con el trabajo y según ausencia laboral.

| Tipo de Dolor crónico | ¿De qué forma afecta su trabajo a su salud? (población trabajando, n=2221) | | | | | | | | | | | | Ausencia Laboral  (población trabajando, n=2221) | | | | | | |
| --- | --- | --- | --- | --- | --- | --- | --- | --- | --- | --- | --- | --- | --- | --- | --- | --- | --- | --- | --- |
| Tiene dolores de espalda | | Nervioso y estresado | | Agotado a todas horas | | Dolores musculares | | Dolor de cabeza | | Problemas de sueño | |
| Sí (n=386) | No (n=1814) | Sí (n=260) | No (n=1940) | Sí (n=142) | No (n=2056) | Sí (n=269) | No (n=1929) | Sí (n=161) | No (n=2038) | Sí (n=140) | No (n=2060) | 0 días (n=1863) | De 1 a 3 días (n=127) | | | Entre 3 y 7 días (n=61) | Más de una semana (n=67) | |
| Discapacitante | 12,7% (49) | 4,2% (77) | 11,9% (31) | 4,9% (95) | 14,8% (21) | 5,1% (105) | 13,4% (36) | 4,6% (90) | 14,4% (23) | 5% (102) | 15% (21) | 5% (104) | 5,1% (95) | | 7,1% (9) | 11,6% (7) | | | 17,8% (12) |
| Intervalo de confianza 95% | (9,7-16,4) | (4,8-6,8) | (8,5-16,5) | (4-5,9) | (9,8-21,6) | (4,2-6,1) | (9,8-18,1) | (3,8-5,7) | (9,7-20,7) | (4,1-6) | (10-22) | (4,2-6,1) | (4,2-6,2) | | (3,8-13,1) | (5,6-22,3) | | | (10,4-28,8) |
| CV | 0,133 | 0,111 | 0,168 | 0,1 | 0,202 | 0,095 | 0,155 | 0,103 | 0,193 | 0,096 | 0,201 | 0,095 | 0,1 | | 0,321 | 0,355 | | | 0,262 |
| Test | F(2;12947,9)=28,13; p< 0,001 | | F(2;12947,9)=28,05; p<0,001 | | F(2;12947,9)=23,34; p<0,001 | | F(2;12947,9)=20,94; p<0,001 | | F(2;12947,9)=16,71; p<0,001 | | F(2;12947,6)=14,29; p<0,001 | | F(3;19406,79)= 17,447; p < 0,001 | | | | | | |
| No discapacitante | 8,8% (34) | 4,6% (84) | 8,4% (22) | 4,9% (96) | 5,6% (8) | 5,3% (110) | 8,5% (23) | 4,9% (94) | 9,9% (16) | 4,9% (101) | 8,5% (12) | 5,1% (106) | 4,9% (92) | | 7,9% (10) | 14,7% (9) | | | 7,5% (5) |
| Intervalo de confianza 95% | (6,3-12) | (3,7-5,7) | (5,6-12,4) | (4,1-6) | (2,8-10,8) | (4,4-6,4) | (5,7-12,5) | (4-5,9) | (6,1-15,5) | (4,1-6) | (4,9-14,3) | (4,3-6,2) | (4-6) | | (4,3-14,1) | (7,8-25,9) | | | (3,2-16,8) |
| CV | 0,164 | 0,107 | 0,204 | 0,099 | 0,344 | 0,093 | 0,2 | 0,101 | 0,237 | 0,097 | 0,277 | 0,094 | 0,102 | | 0,303 | 0,308 | | | 0,43 |

a Al menos una enfermedad crónica de estudio a excepción de las de dolor
