# Supplementary material
Source: Elsevier journal article supplement (https://www.sciencedirect.com/science/article/pii/S0212656716305522)
Supplement: mmc8 [file S0212656716305522:mmc8.docx]

Tabla 8 (Suplementaria). Prevalencia de dolor crónico y medicación o terapia en población con dolor crónico según sexo y edad (Andalucía, 2011).

Un 75,1% de la población con DC recibe alguna medicación u otro tipo de terapia por ello, suponiendo un 12,9% en la población de estudio. Además, casi el 80% de las mujeres con DC reciben medicación o terapia por ello, porcentaje significativamente superior al de los hombres y similar al de la población mayor de 65 años con DC.

| POBLACIÓN | DOLOR CRÓNICO | | MEDICACIÓN O TERAPIA en la población con dolor crónico | | DOLOR CRÓNICO y MEDICACIÓN O TERAPIA en la población general | |
| --- | --- | --- | --- | --- | --- | --- |
| Prevalencia | I,C, 95% | Porcentaje | I,C, 95% | Porcentaje | I,C, 95% |
| Total | 17,2% | 16,3-18,12 | 75,1% | 72,45-77,49 | 12,9% | 12,11-13,73 |
| Mujeres | 23,9% (p<0,001) | (22,5-25,4) | 79,1% (p<0,001) | 76,1-81,8 | 18,9% (p<0,001) | 17,6-20,3 |
| Hombres | 10,3% | (9,3-11,4) | 65,4% | 60,1-70,3 | 6,8% | 5,9-7,7 |
| 16-44 años | 11,4% | 10,4-12,5 | 71,5% | 66,8-75,8 | 8,1% | 7,3-9,1 |
| 45-64 años | 18,2% | 16,5-20 | 72,4% | 67,4-76,8 | 13,2% | 11,7-14,8 |
| >= 65 años | 32,3%(p<0,001) | 29,7-35 | 81%(p<0,001) | 76,8-84,6 | 26,1%(p<0,001) | 23,7-28,7 |
