# Supplementary material
Source: Elsevier journal article supplement (https://www.sciencedirect.com/science/article/pii/S0212656716305522)
Supplement: mmc9 [file S0212656716305522:mmc9.docx]

Tabla 9 (Suplementaria). Prevalencia de dolor crónico discapacitante según consumo de medicamentos, hospitalización y urgencias.

La prevalencia de DCD es casi del doble en población hospitalizada en el último año que en población no hospitalizada (19,1% y 10,9%, respectivamente; p<0,001), mientras la de DCnD fue muy similar en ambas poblaciones (5,5% y 7,7%; Tabla 7 material suplementario). Con respecto a la utilización de urgencias en el último año, se observaron prevalencias similares a hospitalización.

| Poblaciones | | Medicinas para el dolor y/o para la fiebre | | Otros medicamentos (gotas, pastillas, inyecciones, supositorios, etc.) | | Ingreso en hospital (al menos una noche, últimos 12 meses) | | Utilizar algún servicio de urgencias (últimos 12 meses) | |
| --- | --- | --- | --- | --- | --- | --- | --- | --- | --- |
| Sí | No | Sí | No | Sí | No | Sí | No |
| Dolor crónico no discapacitante | Porcentaje | 12,3% (205) | 3,4% (165) | 6,6% (219) | 4,8% (152) | 5,5% (28) | 5,7% (343) | 6,4% (100) | 5,5% (271) |
| Inter. Conf. 95% | (10,8-13,9) | (2,9-4,0) | (5,8-7,5) | (4,1-5,6) | (3,8-7,9) | (5,1-6,3) | (5,3-7,7) | (4,9-6,2) |
| CV | 0,065 | 0,076 | 0,065 | 0,079 | 0,184 | 0,052 | 0,097 | 0,059 |
| N | 1667 | 4825 | 2492 | 2886 | 507 | 5997 | 1571 | 4928 |
| Dolor crónico discapacitante | Porcentaje | 32,1% (535) | 4,4% (213) | 18,6% (619) | 4,1% (129) | 19,1 (97) | 10,9% (651) | 17,4% (273) | 9,6% (474) |
| Inter. Conf. 95% | (29,9-34,4) | (3,9-5,0) | (17,3-20,0) | (3,4-4,8) | (15,9-22,8) | (10,1-11,7) | (15,6-19,3) | (8,8-10,5) |
| CV | 0,035 | 0,067 | 0,036 | 0,086 | 0,091 | 0,037 | 0,055 | 0,044 |
| N | 1667 | 4825 | 2492 | 2886 | 507 | 5997 | 1571 | 4928 |
| Test | F(2;12947)= 598,75; p < 0,001 | | F(2;12947)= 180,27; p<0,001 | | F(2;12947)= 15,79; p<0,001 | | F(2;12947)= 37,3; p < 0,001 | |
