# Supplementary material
Source: Elsevier journal article supplement (https://www.sciencedirect.com/science/article/pii/S0212656716305522)
Supplement: mmc11 [file S0212656716305522:mmc11.docx]

Tabla 11. Prevalencia de dolor crónico según utilización de consulta médica y tipo de seguro sanitario.

| Poblaciones | Acudir a Centro de Salud (consultorio) o Ambulatorio (centro de Especialidades) de la seguridad Social/SAS (últimos 12 meses) | | | | | | | Tipo de medico visitado | | | | Titular de alguna modalidad de Seguro Sanitario | | | |
| --- | --- | --- | --- | --- | --- | --- | --- | --- | --- | --- | --- | --- | --- | --- | --- |
| Sí, por algo que le pasaba a usted (n=3707) | Sí, por algo que le pasaba a otra persona (n=630) | | Sí, ambos motivos (n=1274) | | | No (n=889) | Médico General (n=1437) | Médico Especialista (n=354) | | No (n=4690) | Seguridad Social (n=6112) | Privado / Concertado (n=128) | | Ambos seguros (n=260) |
| Dolor crónico | 20,19% (748) | 8,87% (56) | 19,27% (246) | | 7,65% (68) | | | 24,67% (355) | 25,73% (91) | | 14,27% (669) | 17,2% (1053) | 14,89% (19) | 18,11% (47) | |
| Inter. Conf. 95% | (18,93-21,5) | (6,9-11,3) | (17,2-21,53) | | (6,07-9,59) | | | (22,52-26,96) | (21,44-30,54) | | (13,3-15,29) | (16,3-18,18) | (9,71-22,15) | (13,88-23,28) | |
| CV | 0,033 | 0,127 | 0,057 | | 0,117 | | | 0,046 | 0,09 | | 0,036 | 0,028 | 0,211 | 0,132 | |
| Test | F(3;19406,86)= 38,287; p < 0,001 | | | | | | | F(2;12937,99)= 51,344; p < 0,001 | | | | F(3;19406,91)= 0,488; p = 0,69 | | | |
| Dolor crónico discapacitante | 13,8% (510) | 5,0% (32) | 13,3% (170) | | 4,0% (36) | | | 18,7% (269) | 19,2% (68) | | 8,8% (410) | 11,7% (712) | 6,3% (8) | 10,8% (28) | |
| Inter. Conf. 95% | (12,7-14,9) | (3,6-7,0) | (11,6-15,3) | | (2,9-5,6) | | | (16,8-20,8) | (15,4-23,6) | | (8,0-9,6) | (10,9-12,5) | (3,2-12,1) | (7,6-15,2) | |
| CV | 0,041 | 0,172 | 0,071 | | 0,163 | | | 0,055 | 0,109 | | 0,047 | 0,035 | 0,351 | 0,185 | |
| Test | F(6;38843,41)= 20,032; p < 0,001 | | | | | | | F(4;25895,55)= 33,034; p < 0,001 | | | | F(6;38834,34)= 1,239; p = 0,283 | | | |
| Dolor crónico no discapacitante | 6,4% (238) | 3,8% (24) | 6,0% (76) | | 3,6% (32) | | | 6,0% (86) | 6,5% (23) | | 5,5% (259) | 5,6% (341) | 8,6% (11) | 7,3% (19) | |
| Inter. Conf. 95% | (5,7-7,2) | (2,6-5,6) | (4,8-7,4) | | (2,6-5,0) | | | (4,8-7,3) | (4,4-9,6) | | (4,9-6,2) | (5,0-6,2) | (4,8-14,9) | (4,7-11,2) | |
| CV | 0,063 | 0,200 | 0,111 | | 0,174 | | | 0,104 | 0,202 | | 0,060 | 0,052 | 0,288 | 0,221 | |
| Test | No procede | | | | | | | No procede | | | | No procede | | | |
| Dolor crónico No Oncológico | 19,68% (729) | 8,7% (55) | 18,8% (240) | | | | 7,53% (67) | 23,98% (345) | | 24,06% (85) | 14,03% (658) | 16,8% (1027) | 14,89% (19) | | 17,72% (46) |
| Inter. Conf. 95% | (18,43-20,98) | (6,7-11,17) | (16,75-21,04) | | | | (5,97-9,46) | (21,84-26,25) | | (19,88-28,79) | (13,07-15,05) | (15,88-17,75) | (9,7-22,15) | | (13,54-22,85) |
| CV | 0,033 | 0,129 | 0,058 | | | | 0,117 | 0,047 | | 0,095 | 0,036 | 0,028 | 0,211 | | 0,134 |
| Test | F(3;19406,83)= 36,658; p < 0,001 | | | | | | | F(2;12937,99)= 45,977;p < 0,001 | | | | F(3;19406,91)= 0,434; p = 0,729 | | | |
| Otras enfermedades crónicas a | 56,9% (2114) | 20,8% (131) | | 46,35% (591) | | 16,9% (150) | | 68,82% (990) | | 72% (255) | 37% (1737) | 46,3% (2832) | 38,21% (49) | 40,78% (106) | |
| Inter, Conf, 95% | (55,35-58,53) | (17,81-24,14) | | (43,63-49,1) | | (14,6-19,6) | | (66,37-71,17) | | (67,09-76,43) | (35,65-38,4) | (45,04-47,53) | (30,22-46,89) | (34,97-46,86) | |
| CV | 0,014 | 0,078 | | 0,03 | | 0,074 | | 0,018 | | 0,033 | 0,019 | 0,014 | 0,112 | 0,075 | |
| Test | F(3;19406,56)= 214,121; p < 0,001 | | | | | | | F(2;12937,98)= 274,738;p < 0,001 | | | | F(3;19406,77)= 3,189; p = 0,023 | | | |

a Al menos una enfermedad crónica de estudio a excepción de las de dolor
